# Supplementary material for: Revealing the chemical compatibility of common solvents and electrolytes with Mo2TiC2-based MXenes and their interfaces in aluminum-ion batteries (AIBs) through first-principles molecular dynamics simulations
Source: Royal Society of Chemistry journal article supplement (doi:10.1039/d4nr03978e), 2025-01-01
Supplement: d4nr03978e1.pdf [file d4nr03978e1.pdf]

## Supporting Information

# Revealing the chemical compatibility of common solvents and electrolytes with Mo<sub>2</sub>TiC<sub>2</sub>-based MXenes and Their Interfaces in Aluminum Ion Batteries (AIBs) from First-principles Molecular Dynamics Simulations

Haoliang Liu<sup>1</sup>, Chao Zeng<sup>1</sup>, Ziang Jing<sup>1</sup>, Kai Wu<sup>1</sup>, Yonghong Cheng<sup>1</sup>, Bing Xiao<sup>1,\*</sup>

1. School of Electrical Engineering & State Key Laboratory of Electrical Insulation and Power Equipment, Xi'an Jiaotong University, Xi'an, Shaanxi, 710049, China

\* Corresponding Author: [bingxiao84@xjtu.edu.cn](mailto:bingxiao84@xjtu.edu.cn)

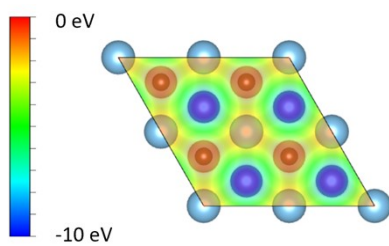

Figure S1. Electrostatic potential of  $\text{Mo}_2\text{TiC}_2$  surface.

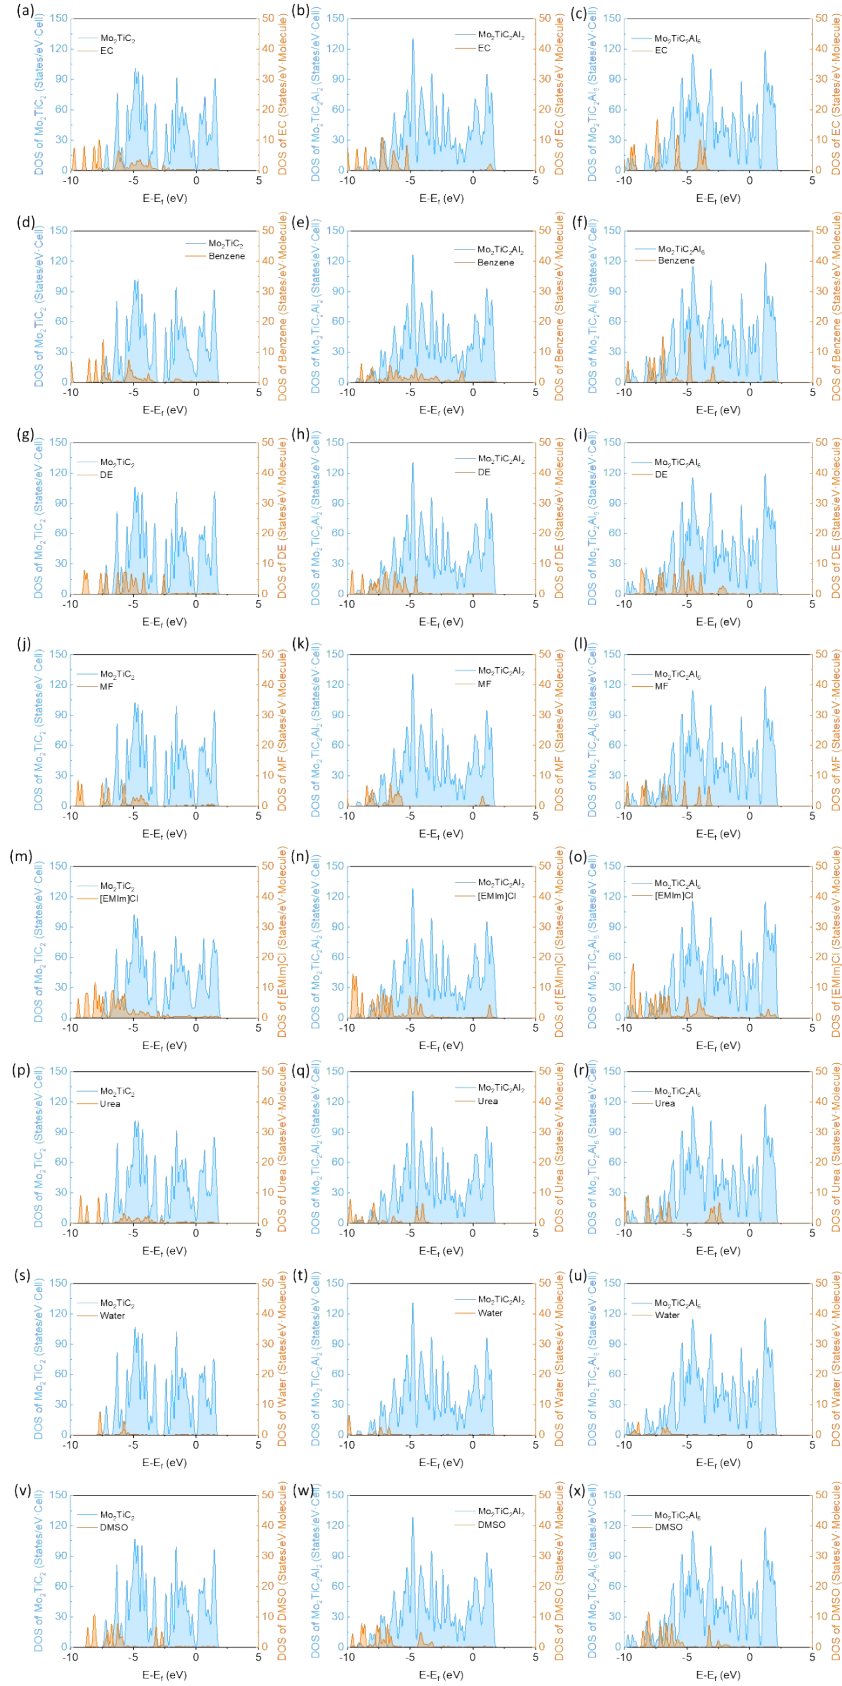

Figure S2. Electronic density of states of adsorbed molecule on  $\text{Mo}_2\text{TiC}_2$ ,  $\text{Mo}_2\text{TiC}_2\text{Al}_2$  and  $\text{Mo}_2\text{TiC}_2\text{Al}_6$ . (a)-(c) EC, (d)-(f) Benzene, (g)-(i) DE, (j)-(l) MF, (m)-(o) [EMIm]Cl, (p)-(r) urea (s)-(u) water and (v)-(x) DMSO.

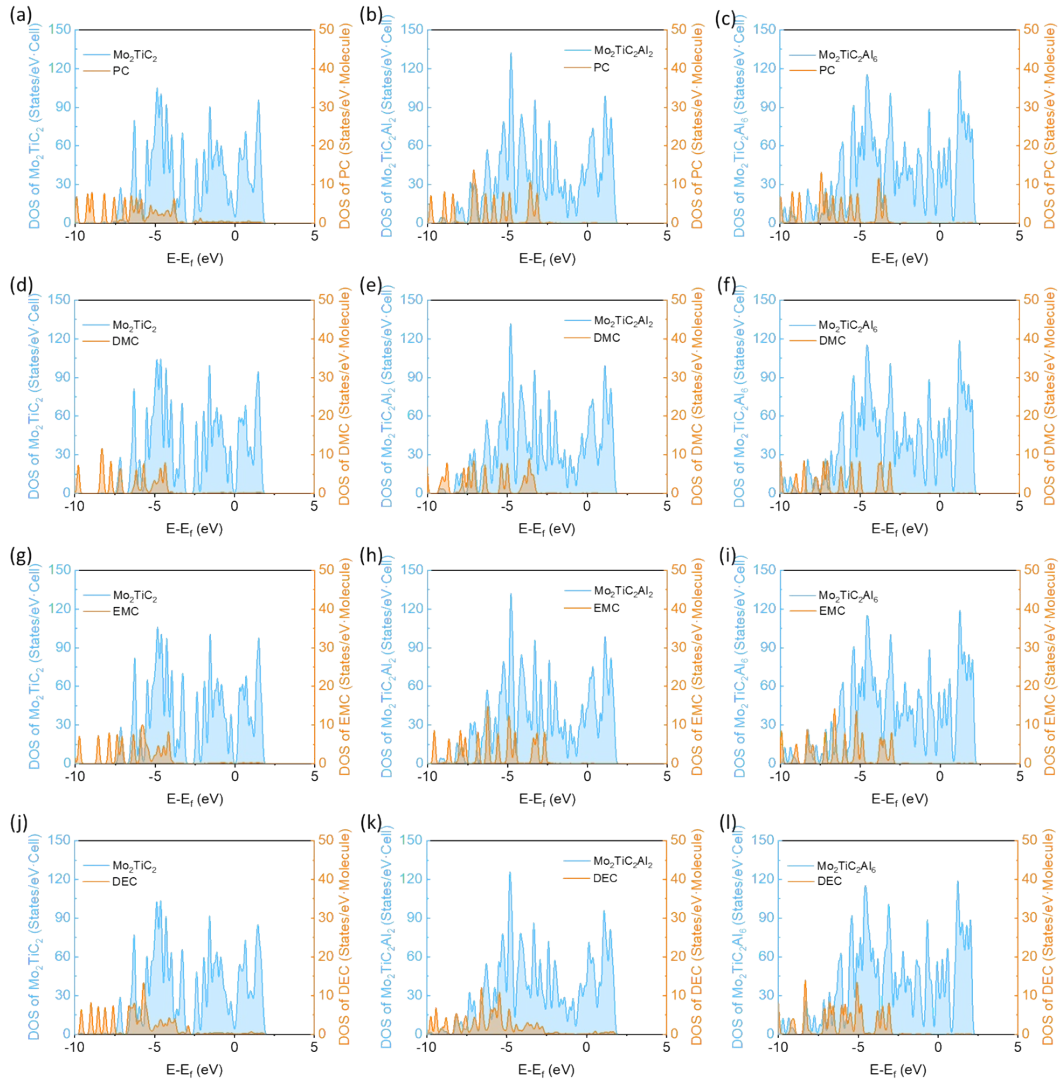

Figure S3. Electronic density of states of adsorbed molecule on  $\text{Mo}_2\text{TiC}_2$ ,  $\text{Mo}_2\text{TiC}_2\text{Al}_2$  and  $\text{Mo}_2\text{TiC}_2\text{Al}_6$ .  
(a)-(c) PC, (d)-(f) DMC, (g)-(i) EMC, (j)-(l) DEC.



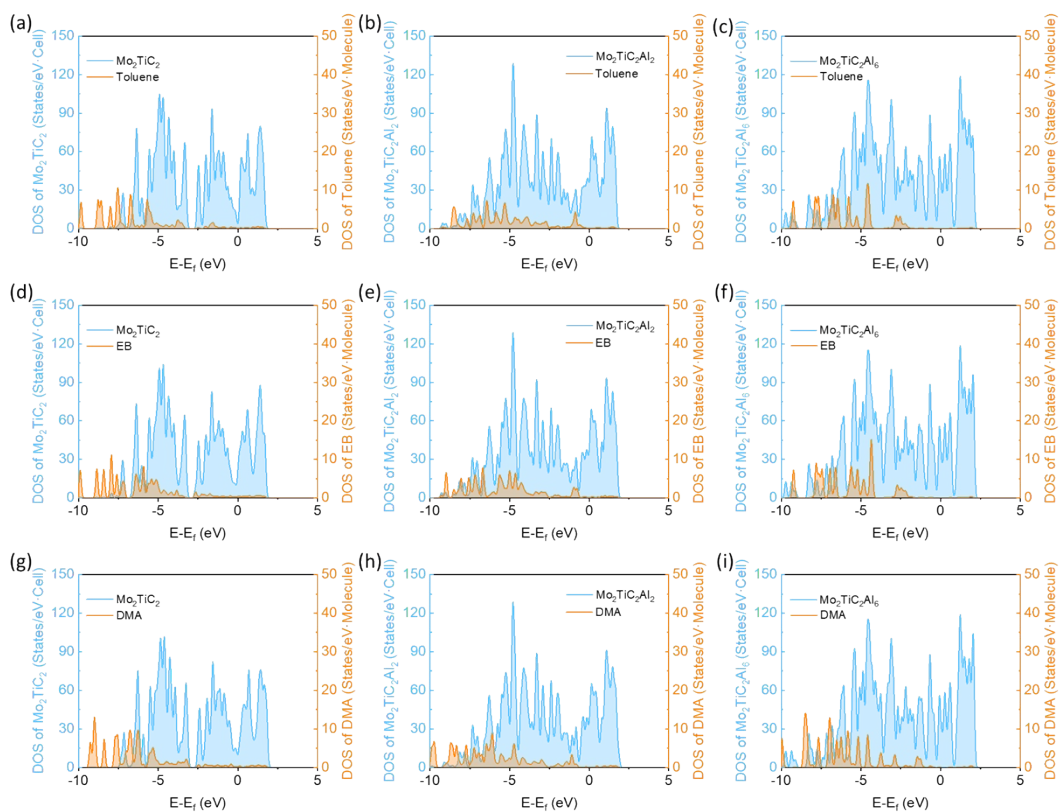

Figure S4. Electronic density of states of adsorbed molecule on  $\text{Mo}_2\text{TiC}_2$ ,  $\text{Mo}_2\text{TiC}_2\text{Al}_2$  and  $\text{Mo}_2\text{TiC}_2\text{Al}_6$ .  
(a)-(c) toluene, (d)-(f) EB, (g)-(i) DMA.

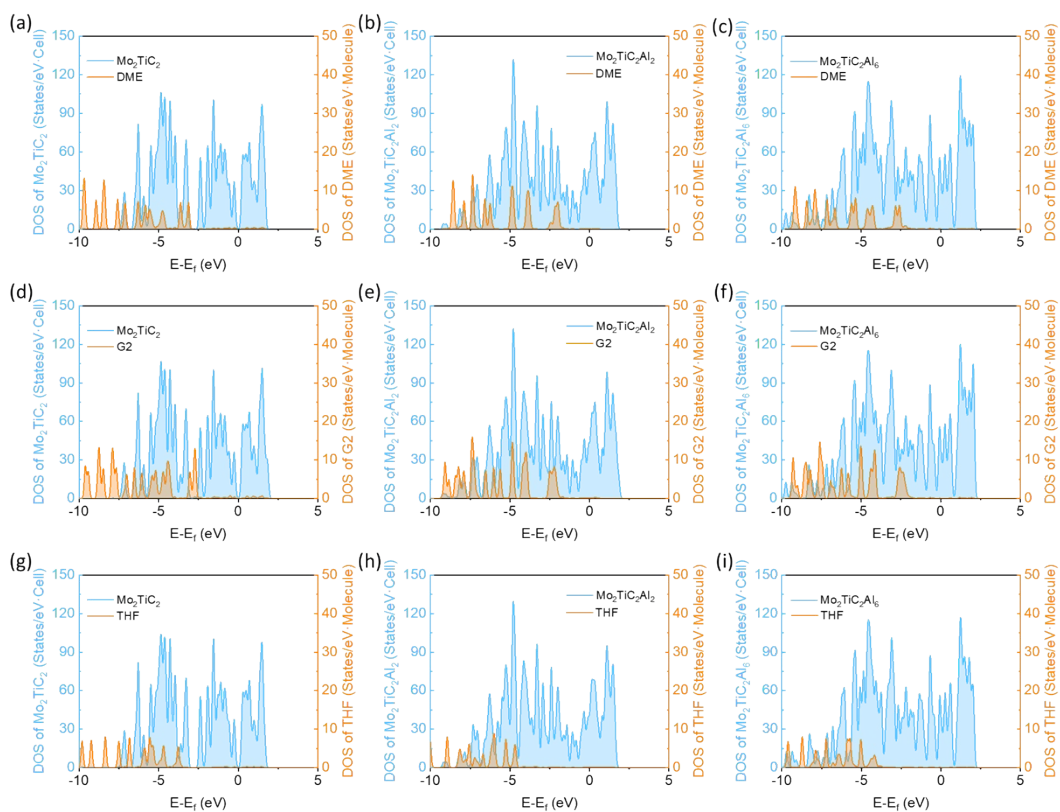

Figure S5. Electronic density of states of adsorbed molecule on  $\text{Mo}_2\text{TiC}_2$ ,  $\text{Mo}_2\text{TiC}_2\text{Al}_2$  and  $\text{Mo}_2\text{TiC}_2\text{Al}_6$ .  
(a)-(c) DME, (d)-(f) G2, (g)-(i) THF.

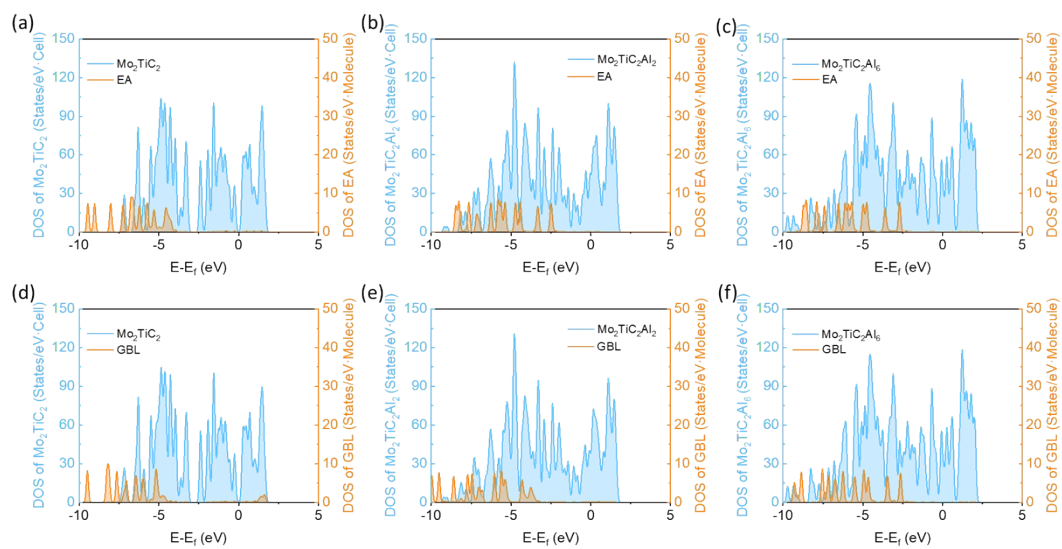

Figure S6. Electronic density of states of adsorbed molecule on  $\text{Mo}_2\text{TiC}_2$ ,  $\text{Mo}_2\text{TiC}_2\text{Al}_2$  and  $\text{Mo}_2\text{TiC}_2\text{Al}_6$ .  
(a)-(c) EA, (d)-(f) GBL.

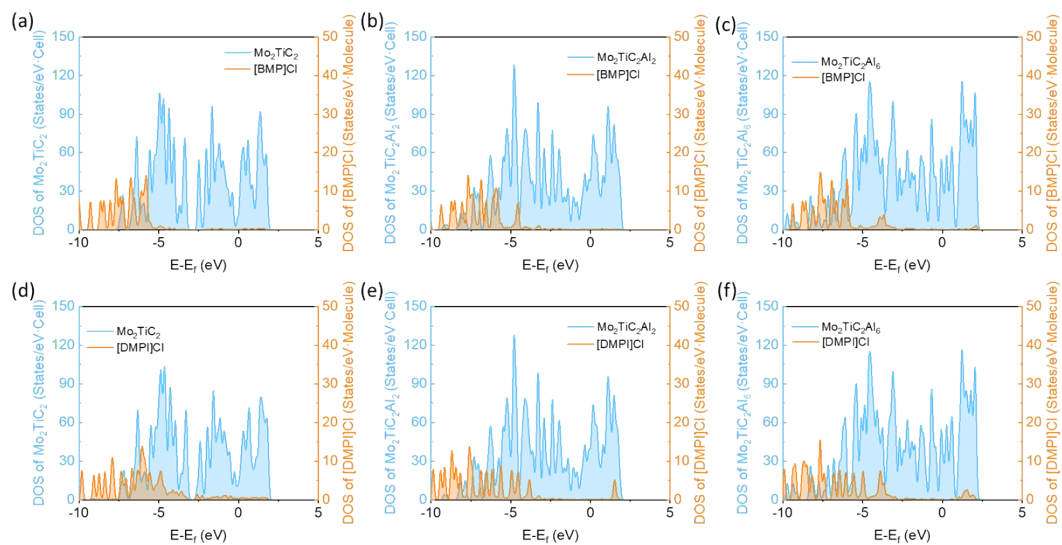

Figure S7. Electronic density of states of adsorbed molecule on  $\text{Mo}_2\text{TiC}_2$ ,  $\text{Mo}_2\text{TiC}_2\text{Al}_2$  and  $\text{Mo}_2\text{TiC}_2\text{Al}_6$ .  
(a)-(c) [BMP]Cl, (d)-(f) [DMPI]Cl.

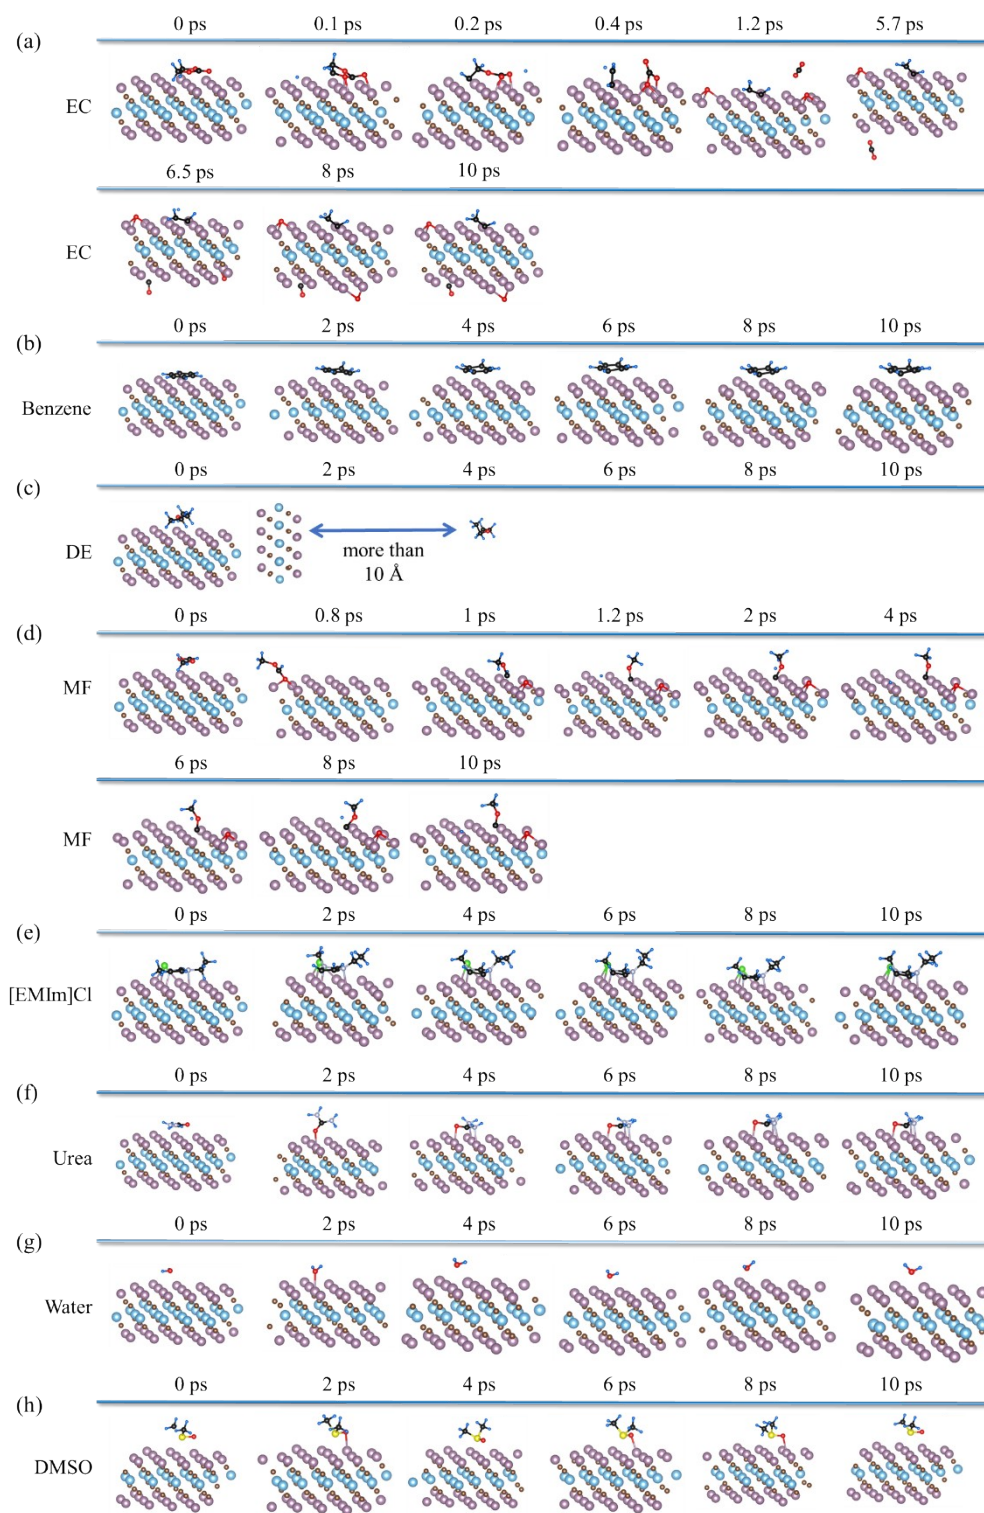

Figure S8. Snapshots of the adsorption of various representative solvents and ionic liquids on bare  $\text{Mo}_2\text{TiC}_2$  monolayer at 300 K and different FPMD simulation times, including: (a) ethylene carbonate (EC), (b) aromatic hydrocarbons (benzene), (c) ethers (diethyl ether or DE), (d) carboxylic esters (methyl formate or MF), (e) ionic liquids ( $[\text{EMIm}]^+\text{Cl}^-$ ), (f) urea, (g) water and (h) DMSO.

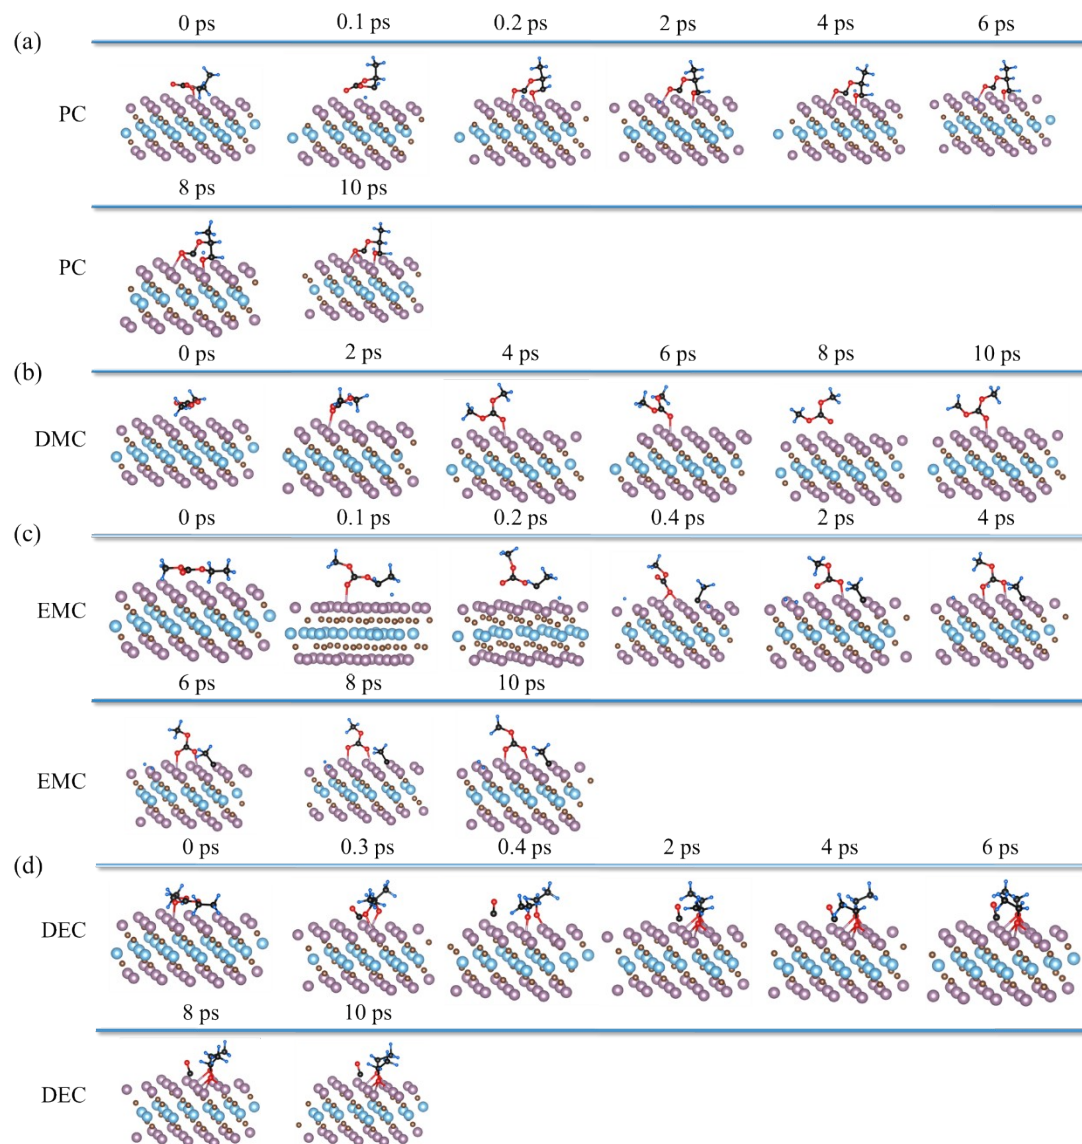

Figure S9. The AIMD simulation results for carbonates with  $\text{Mo}_2\text{TiC}_2$ : (a) PC, (b) DMC, (c) EMC, (d) DEC.



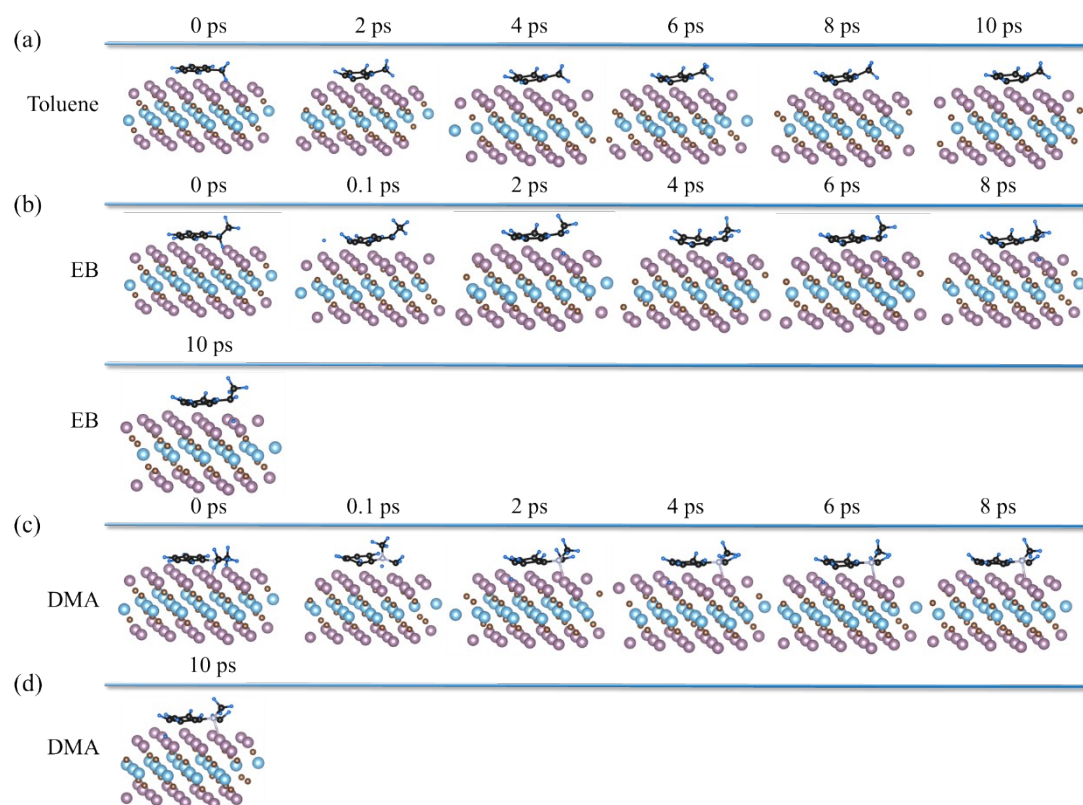

Figure S10. The AIMD simulation results for benzenes with  $\text{Mo}_2\text{TiC}_2$ : (a) Toluene, (b) EB, (c) DMA.

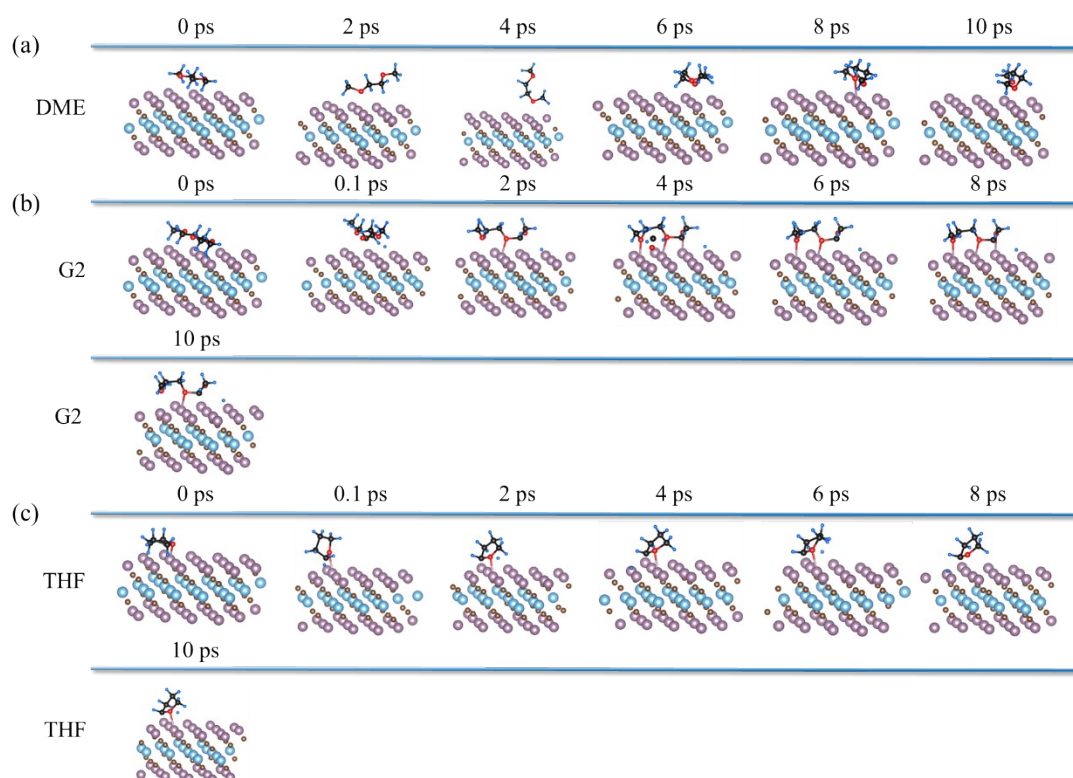

Figure S11. The AIMD simulation results for ethers with  $\text{Mo}_2\text{TiC}_2$ : (a) DME, (b) G2, (c) THF.



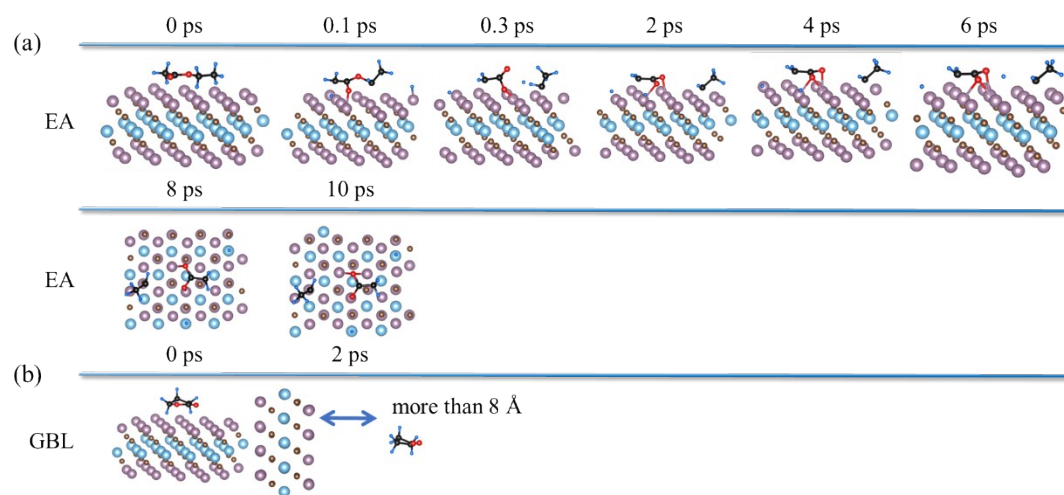

Figure S12. The AIMD simulation results for esters with  $\text{Mo}_2\text{TiC}_2$ : (a) EA, (b) GBL.

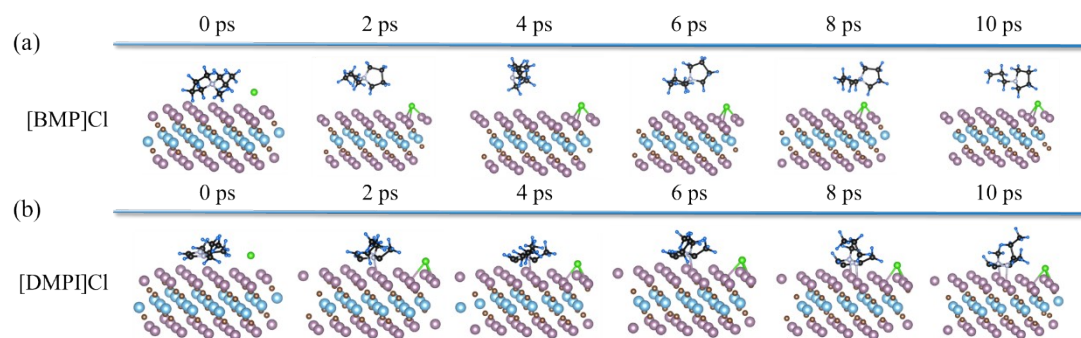

Figure S13. The AIMD simulation results for some ion liquids with  $\text{Mo}_2\text{TiC}_2$ : (a) [BMP]Cl, (b) [DMPI]Cl.

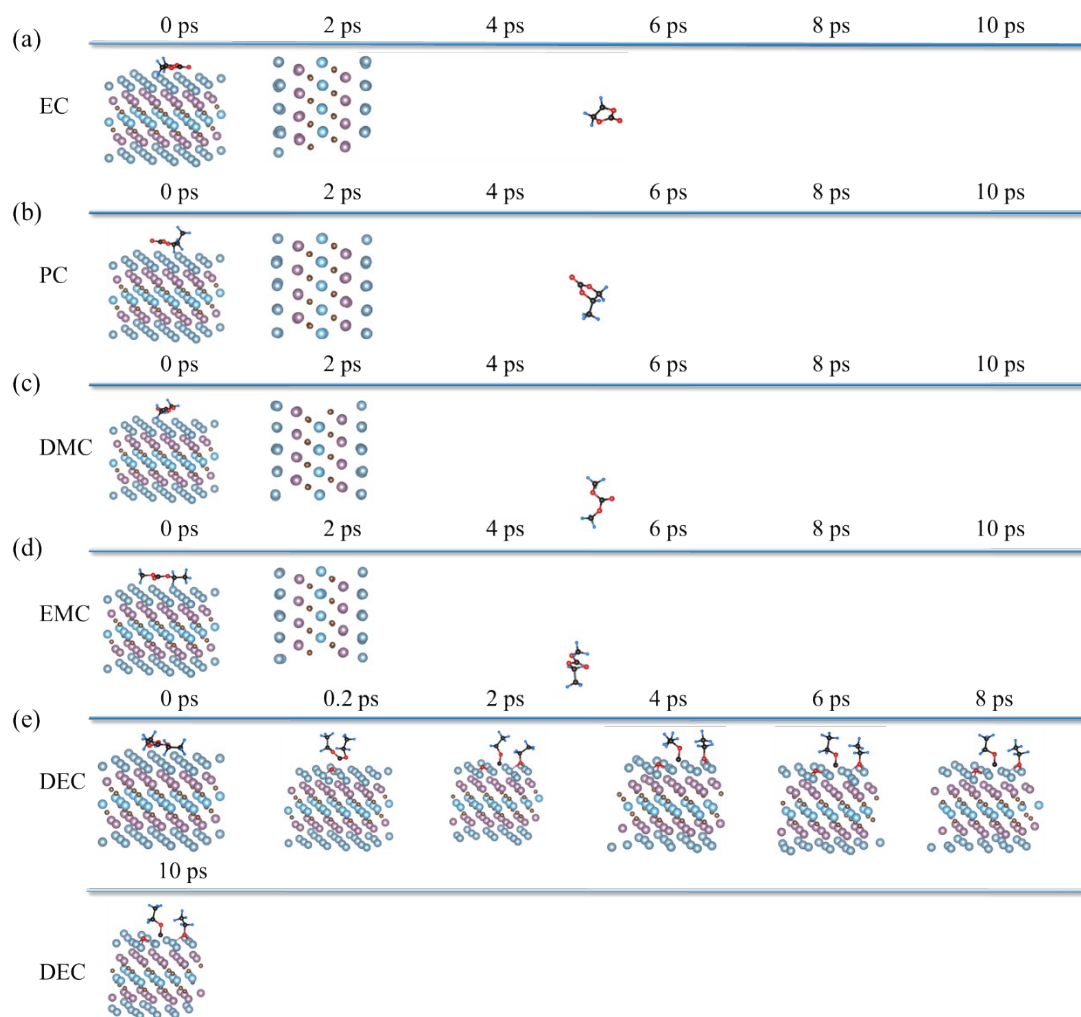

Figure S14. The AIMD simulation results for carbonate esters with  $\text{Mo}_2\text{TiC}_2\text{Al}_2$ : (a) EC, (b) PC, (c) DMC, (d) EMC, (e) DEC.

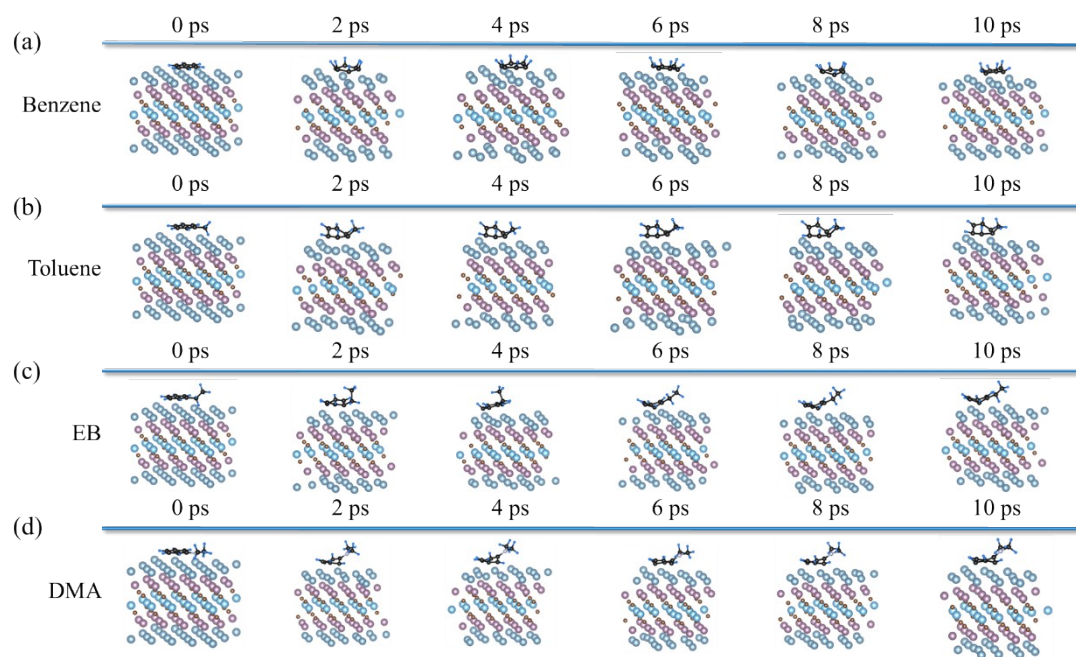

Figure S15. The AIMD simulation results for benzenes with  $\text{Mo}_2\text{TiC}_2\text{Al}_2$ : (a) benzene, (b) toluene, (c) EB, (d) DMA.

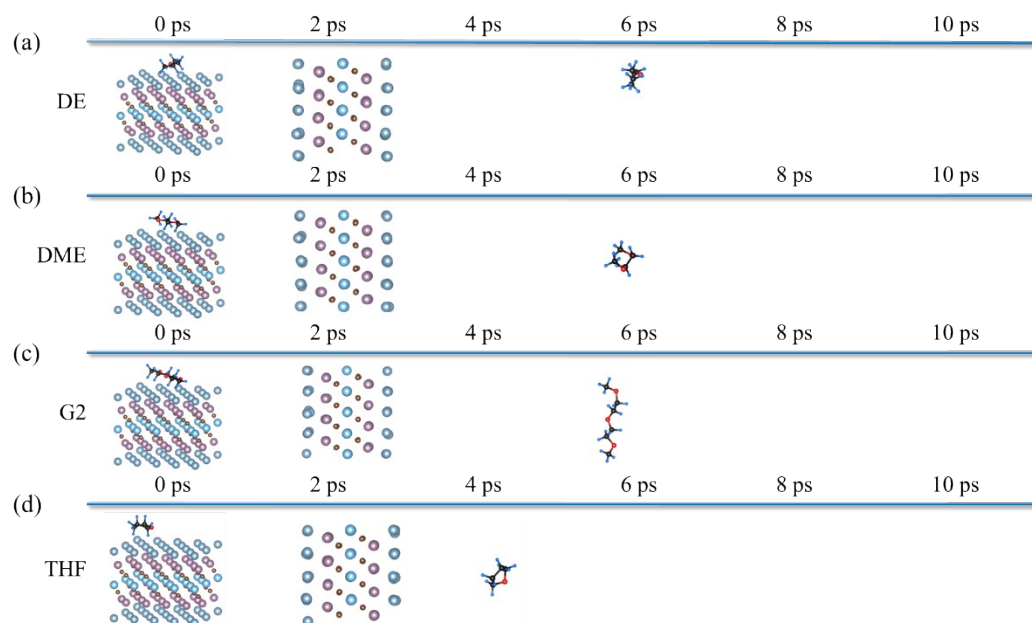

Figure S16. The AIMD simulation results for ethers with  $\text{Mo}_2\text{TiC}_2\text{Al}_2$ : (a) DE, (b) DME, (c) G2, (d) THF.

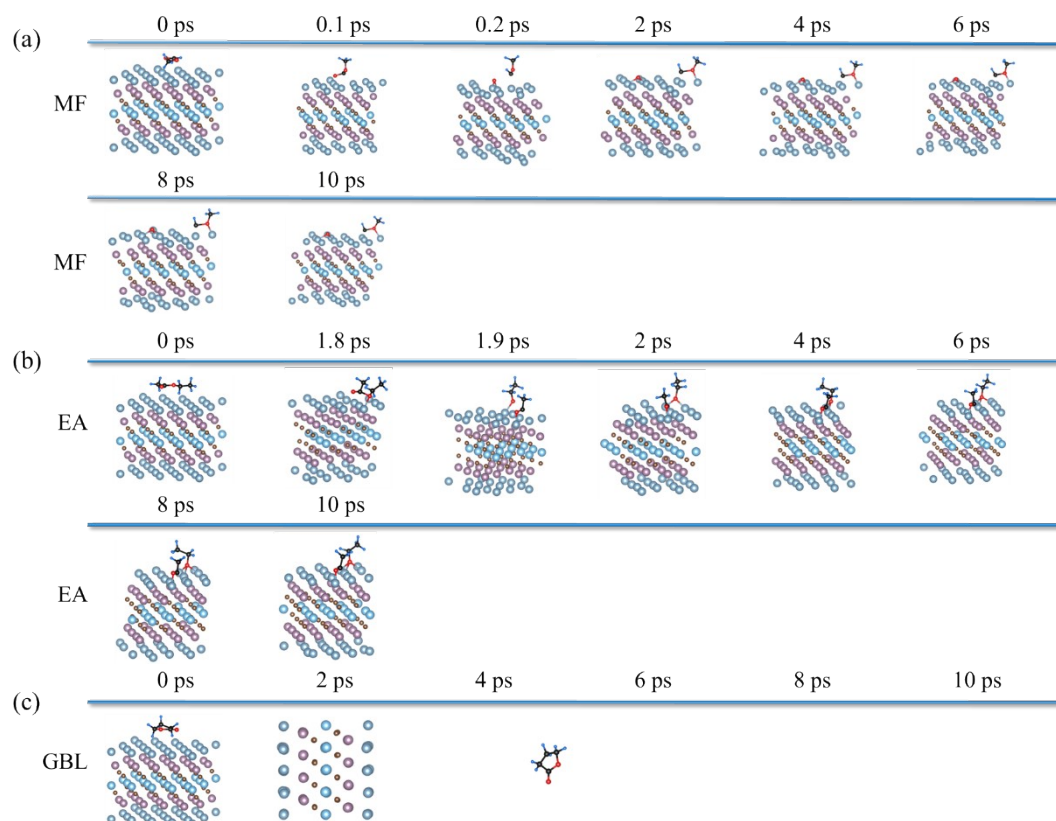

Figure S17. The AIMD simulation results for esters with  $\text{Mo}_2\text{TiC}_2\text{Al}_2$ : (a) MF, (b) EA, (c) GBL.

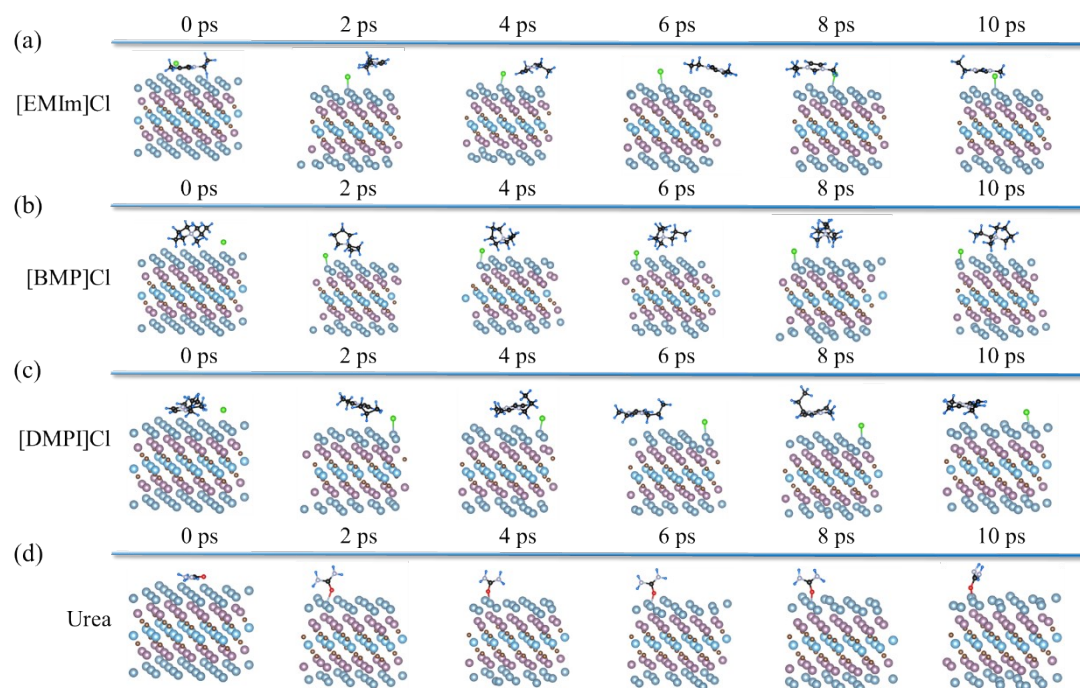

Figure S18. The AIMD simulation results for some ion liquids with  $\text{Mo}_2\text{TiC}_2\text{Al}_2$ : (a) [EMIm]Cl, (b) [BMP]Cl, (c) [DMPI]Cl, (d) urea.

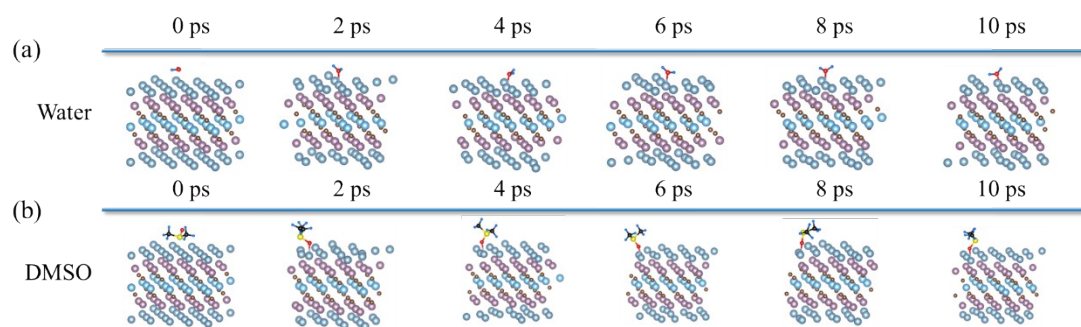

Figure S19. The AIMD simulation results for (a) water and (b) DMSO with  $\text{Mo}_2\text{TiC}_2\text{Al}_2$ .



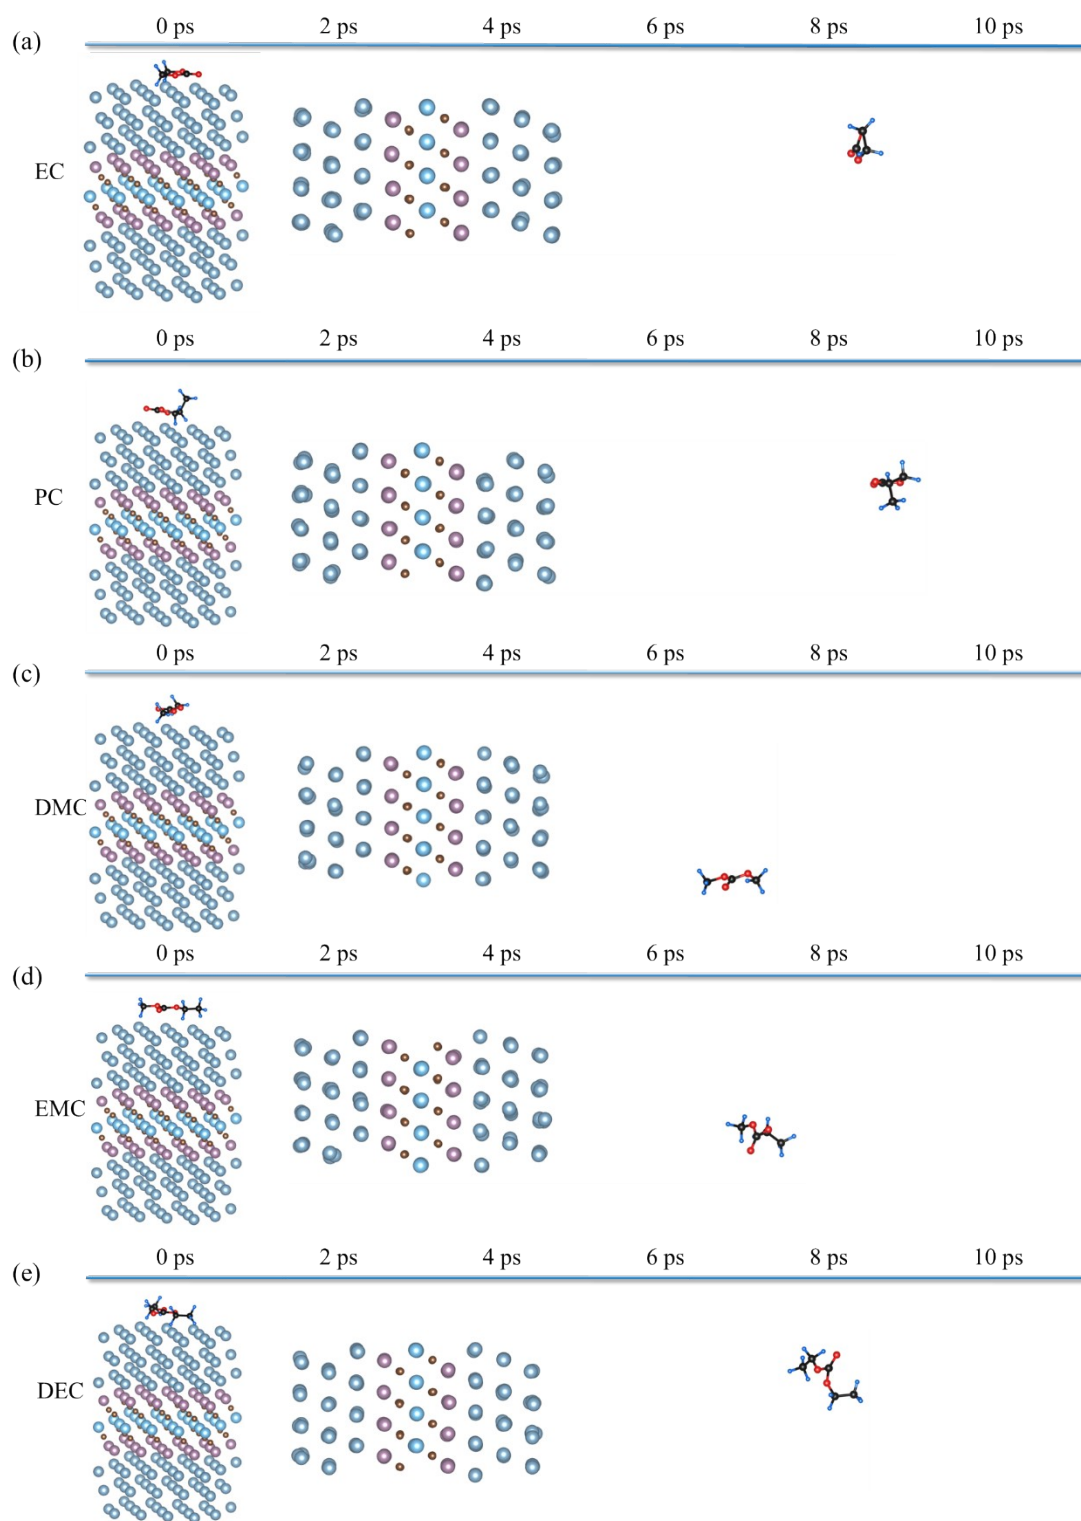

Figure S20. The AIMD simulation results for carbonate esters with  $\text{Mo}_2\text{TiC}_2\text{Al}_6$ : (a) EC, (b) PC, (c) DMC, (d) EMC, (e) DEC.

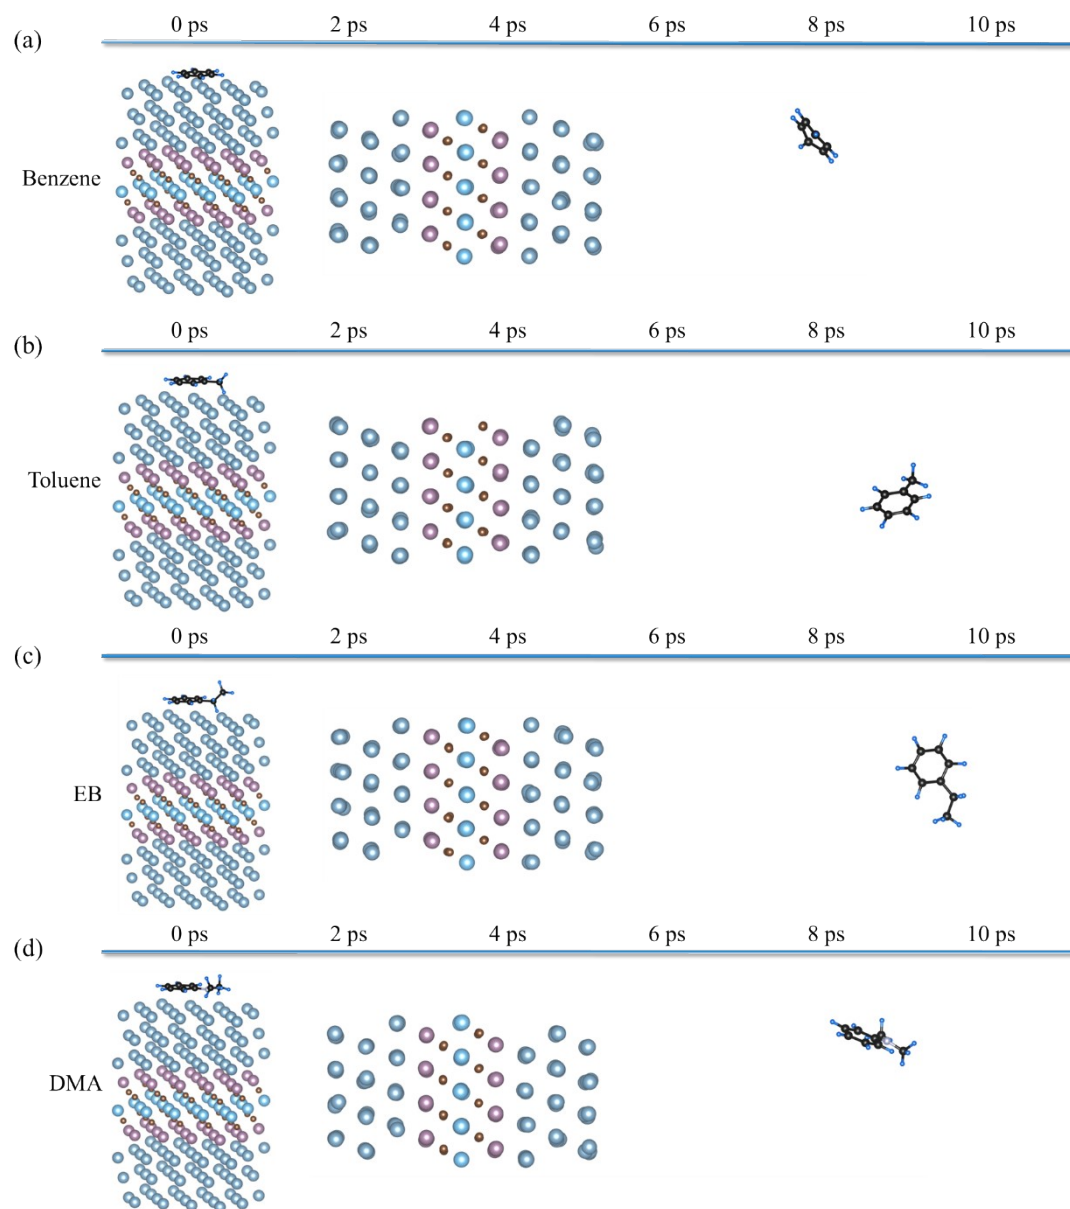

Figure S21. The AIMD simulation results for benzenes with  $\text{Mo}_2\text{TiC}_2\text{Al}_6$ : (a) benzene, (b) toluene, (c) EB, (d) DMA.

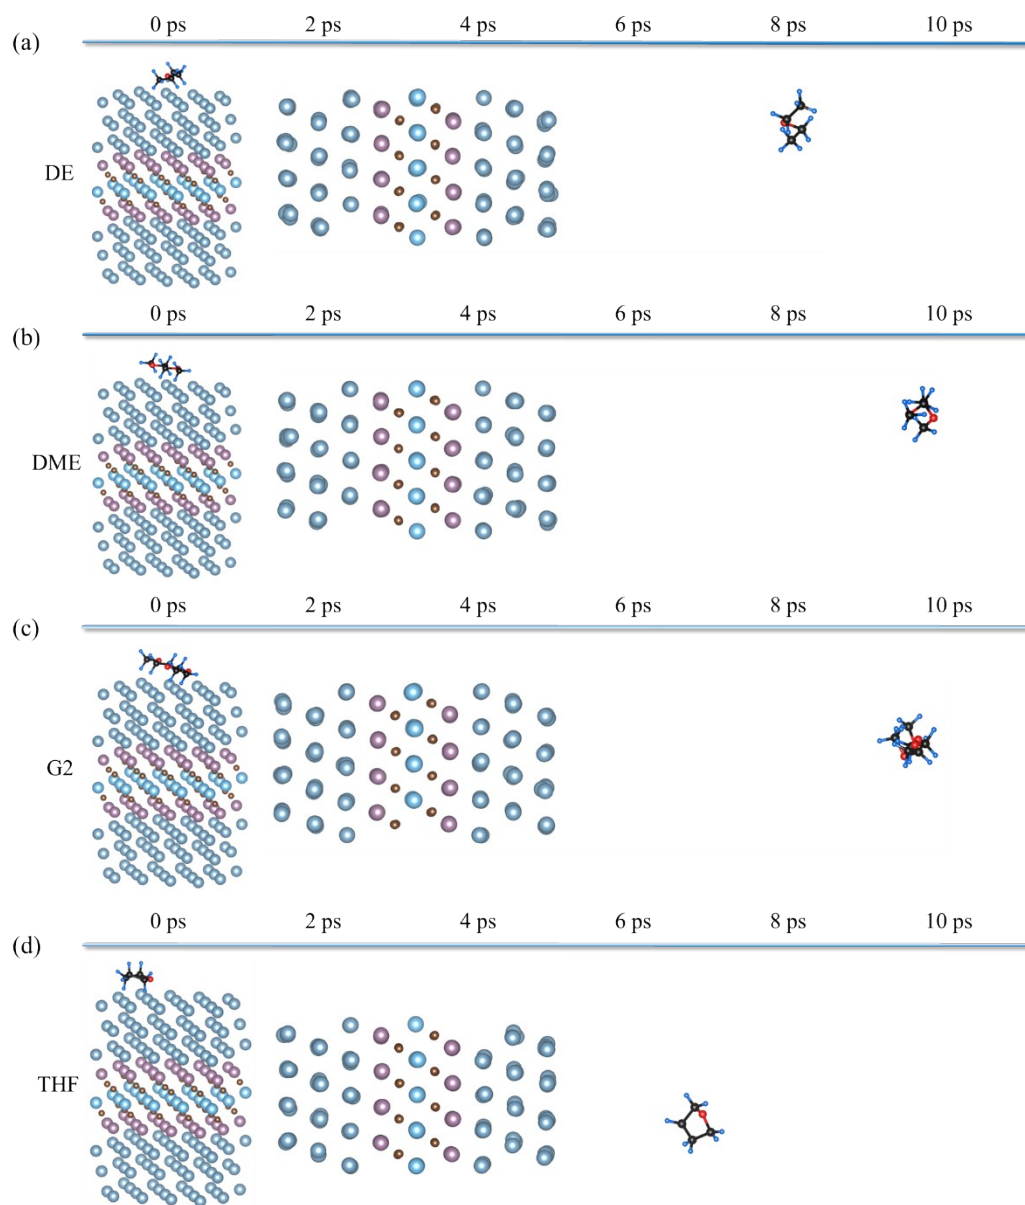

Figure S22. The AIMD simulation results for ethers with  $\text{Mo}_2\text{TiC}_2\text{Al}_6$ : (a) DE, (b) DME, (c) G2, (d) THF.

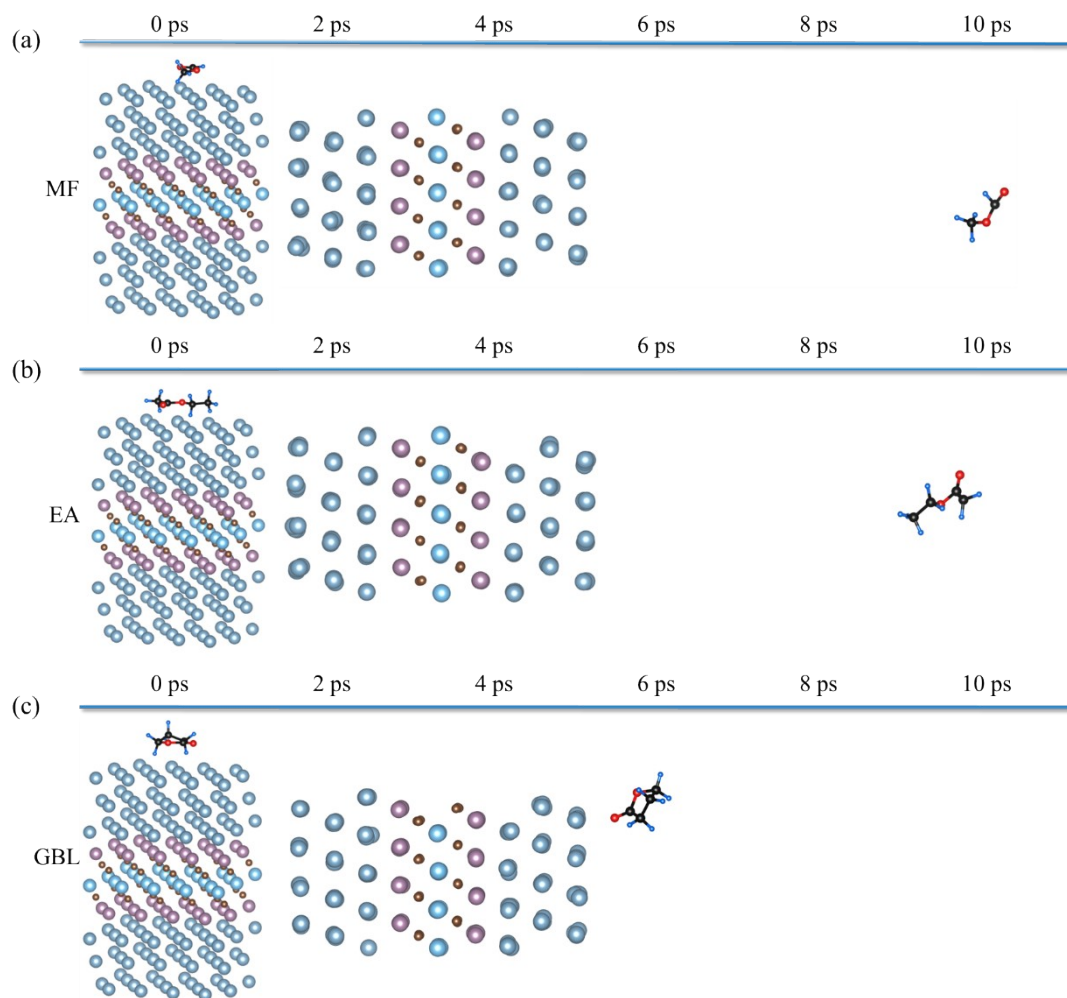

Figure S23. The AIMD simulation results for esters with  $\text{Mo}_2\text{TiC}_2\text{Al}_6$ : (a) MF, (b) EA, (c) GBL.

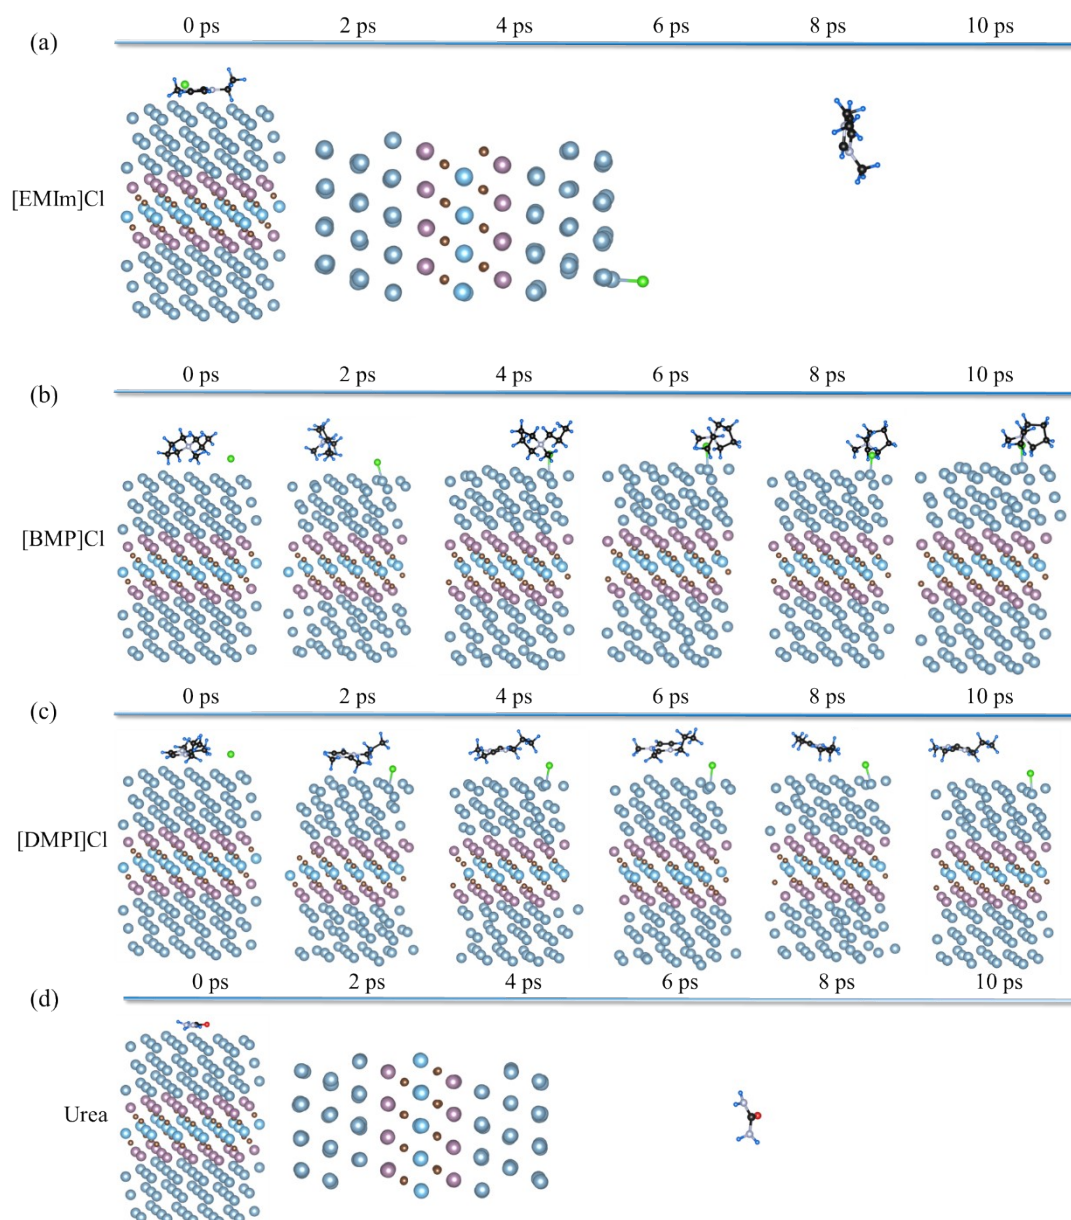

Figure S24. The AIMD simulation results for ion liquids with  $\text{Mo}_2\text{TiC}_2\text{Al}_6$ : (a) [EMIm]Cl, (b) [BMP]Cl, (c) [DMPI]Cl, (d) urea.



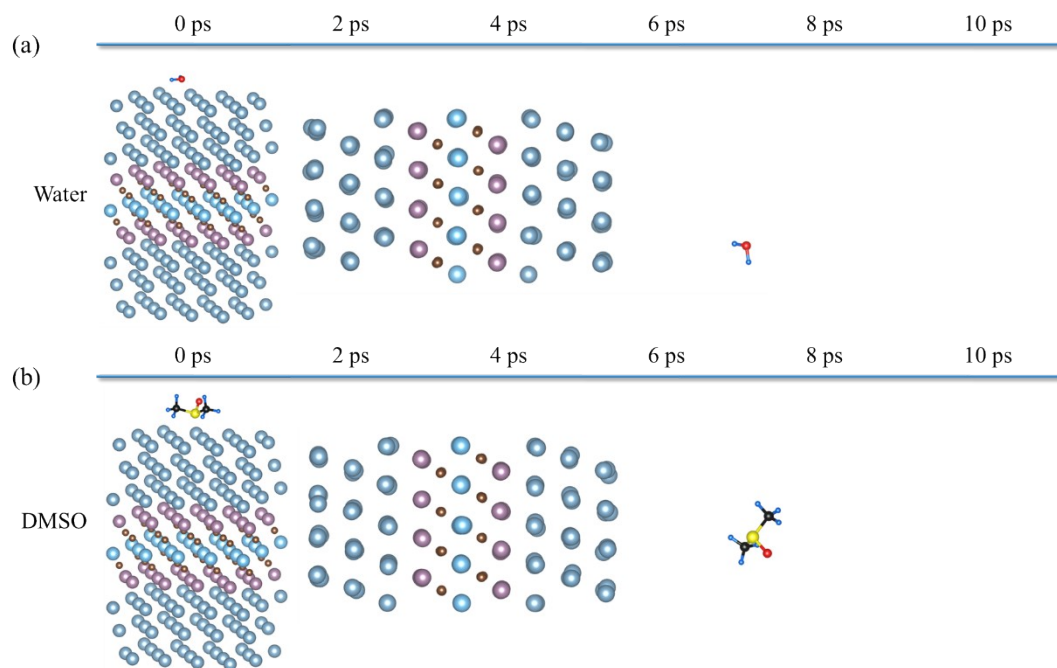

Figure S25. The AIMD simulation results for (a) water and (b) DMSO with  $\text{Mo}_2\text{TiC}_2\text{Al}_6$ .

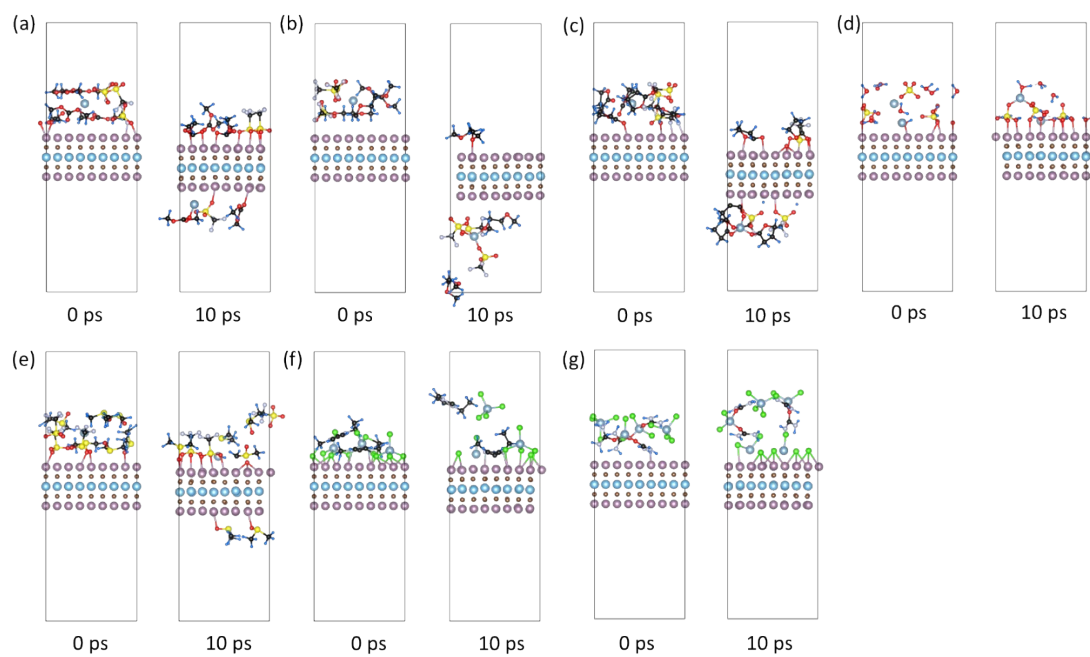

Figure S26. The AIMD simulation results of electrolytes on  $\text{Mo}_2\text{TiC}_2$ . (a) DMC- $\text{Al}(\text{OTf})_3$ , (b) DME- $\text{Al}(\text{OTf})_3$ , (c) GBL- $\text{Al}(\text{OTf})_3$ , (d) water- $\text{Al}_2(\text{SO}_4)_3$ , (e) DMSO- $\text{Al}(\text{OTf})_3$ , (f) [EMIm]Cl- $\text{AlCl}_3$ , (g) urea- $\text{AlCl}_3$ .

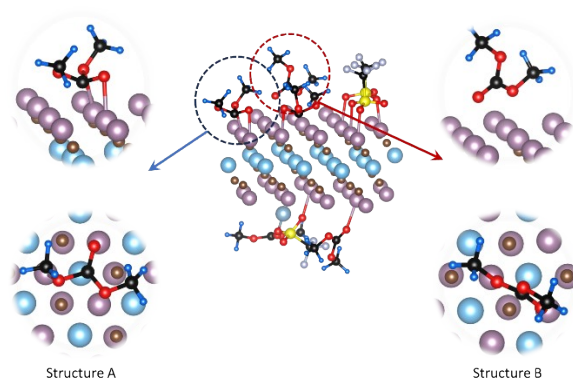

Figure S27. A snapshot representing the interface between the bare  $\text{Mo}_2\text{TiC}_2$  monolayer and the  $\text{DMC-Al(OTF)}_3$  electrolyte at 300 K from FPMD simulation.



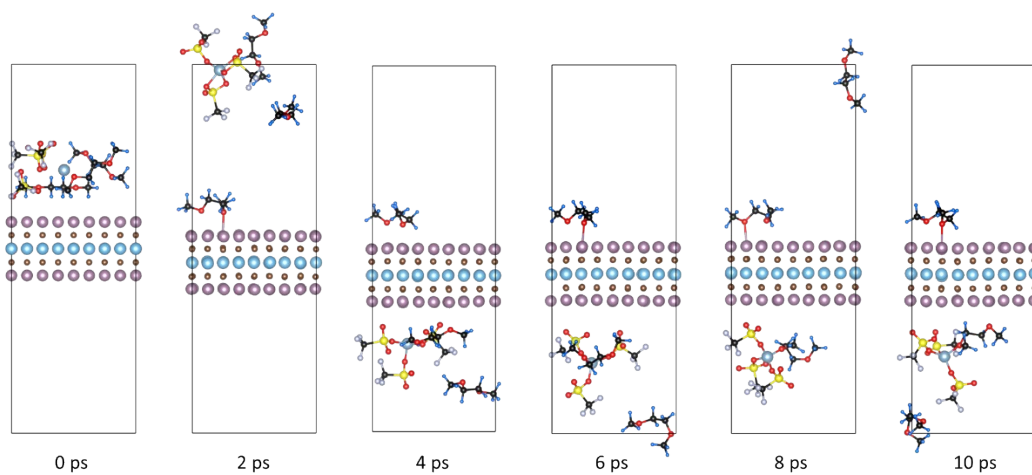

Figure S28. Selected snapshots showing the adsorption of DME-Al(OTF)<sub>3</sub> electrolyte on the bare Mo<sub>2</sub>TiC<sub>2</sub> monolayer at different simulation times in FPMD simulation.
